# Supplementary material for: In Vitro Modulation of Spontaneous Activity in Embryonic Cardiomyocytes Cultured on Poly(vinyl alcohol)/Bioglass Type 58S Electrospun Scaffolds
Source: MDPI journal article supplement (doi:10.3390/nano14040372), 2024-02-17
Supplement: s1 [file s1]

# In Vitro Modulation of Spontaneous Activity in Embryonic Cardiomyocytes Cultured on Poly (Vinyl Alcohol)/Bioglass Type 58S Electrospun Scaffolds

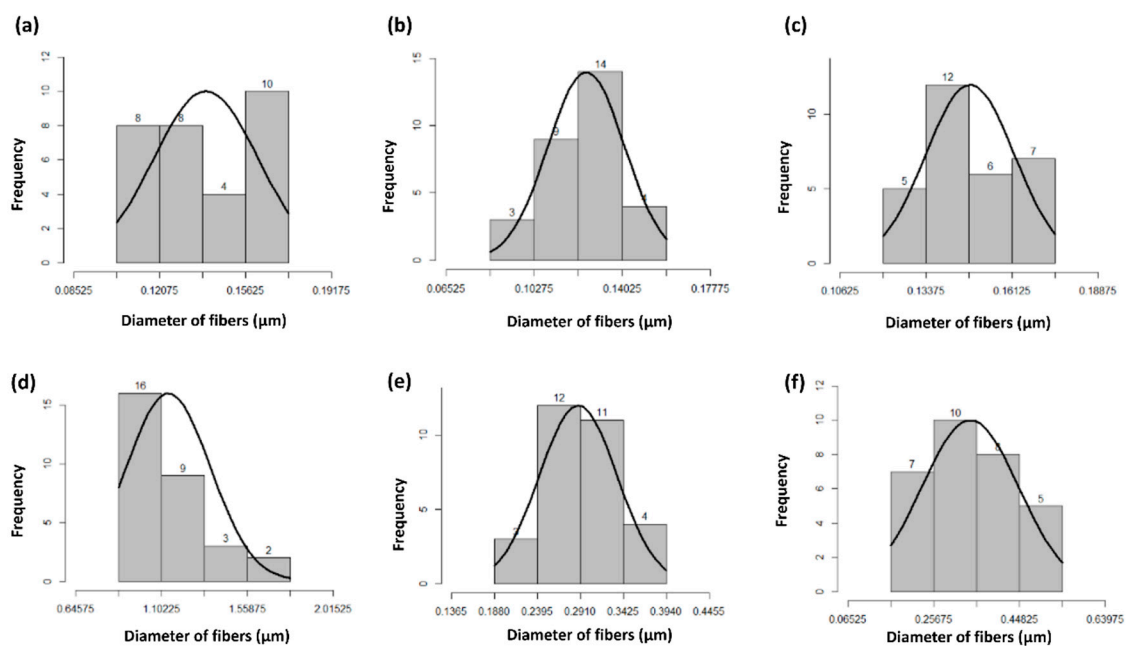

**Figure S1.** Histograms of fiber diameter PVA scaffolds with different Bg concentrations before cross-linking. (a) 5% hybrid, (b) 10% hybrid, (c) 15% hybrid; (d) 20% hybrid; (e) 25% hybrid, and (f) 30% hybrid.

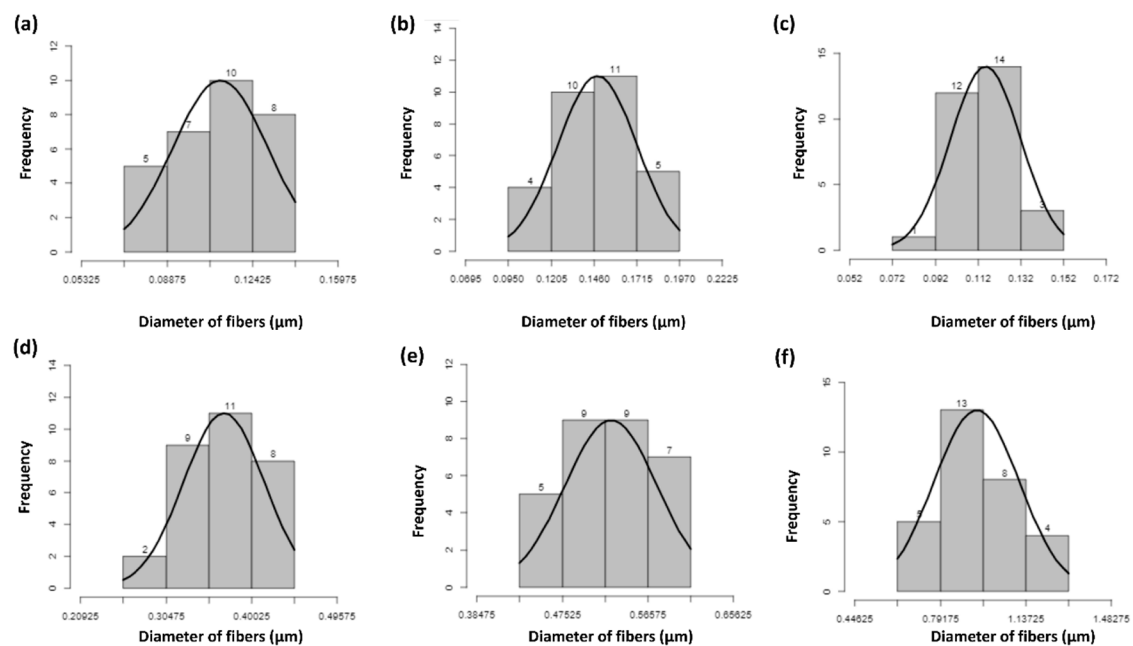

**Figure S2.** Histograms of fiber diameter PVA scaffolds with different Bg concentrations after cross-linking. (a) 5% hybrid, (b) 10% hybrid, (c) 15% hybrid; (d) 20% hybrid; (e) 25% hybrid, and (f) 30% hybrid.

**Table S1.** Functional groups observed by ATR-FTIR in PVA/Bg hybrid scaffolds.

| Bioglass content | Representative signals of the functional groups (cm <sup>-1</sup> ) |            |                  |                     |       |      |     |              |             |             |         |
|------------------|---------------------------------------------------------------------|------------|------------------|---------------------|-------|------|-----|--------------|-------------|-------------|---------|
|                  | O-H                                                                 | -OH        | -CH <sub>2</sub> | H <sub>2</sub> C-CO | HC-OH | C-O  | C-C | Si-O-Si (as) | Si-O-Si (s) | Si-O-Si (δ) | Si-O-Ca |
| 0 %              | 3300                                                                | -          | 2940, 2909       | 1420                | 1327  | 1087 | 840 | ---          | ---         | ---         | ---     |
| 5 %              | 3300                                                                | -          | 2945, 2916       | 1422                | 1327  | 1084 | 840 | --           | ---         | ---         | --      |
| 10 %             | 3300                                                                | -          | 2945, 2916       | 1422                | 1327  | 1084 | 840 | ----         | ---         | ---         | ----    |
| 15 %             | 3300                                                                | -          | 2945, 2916       | 1422                | 1327  | 1084 | 840 | ----         | ---         | ---         | ----    |
| 20 %             | 3300                                                                | 1659       | 2945, 2916       | 1422                | 1326  | 1089 | 832 | 1037         | 930         | 832         | 957     |
| 25 %             | 3300                                                                | 1659       | 2942, 2908       | 1416                | 1327  | 1085 | 845 | 1042         | 920         | 830         | 958     |
| 30 %             | 3227                                                                | 1655       | 2938, 2913       | 1416                | 1327  | 1080 | 825 | 1031         | 930         | 825         | 955     |
| Bg               | 3493, 3443                                                          | 1628, 1612 | ----             | ----                | ----  | ---- | --- | 1042         | 932         | 789         | 956     |

(as), refers to asymmetric vibration, (s) symmetric vibration, and (δ) bending vibration.

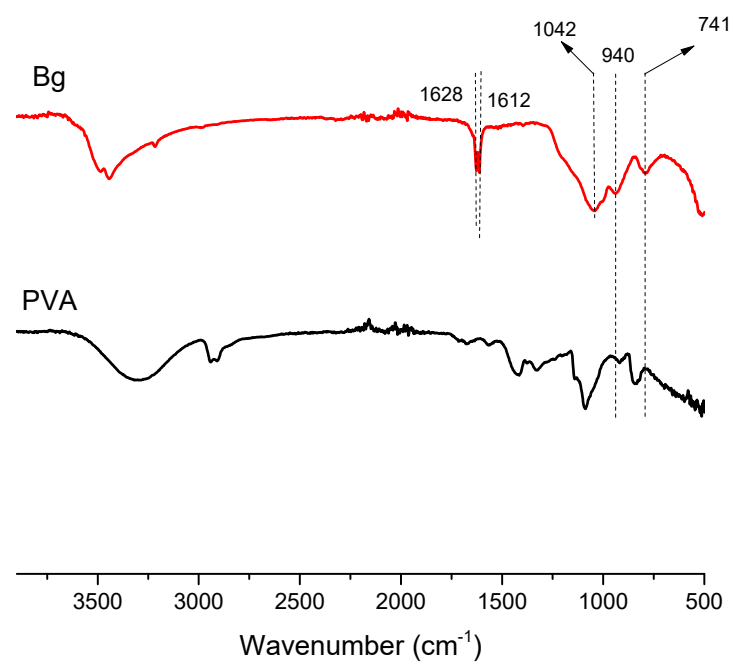

Figure S3. FTIR-ATR spectrum of PVA and 58S bioglass.

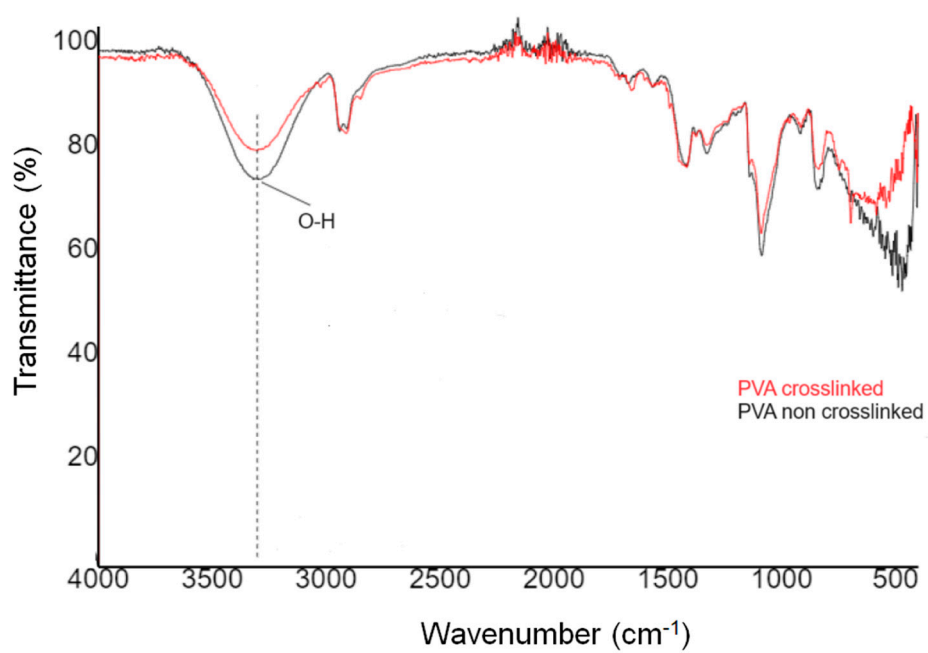

Figure S4. FTIR-spectra of PVA before and after crosslinking.

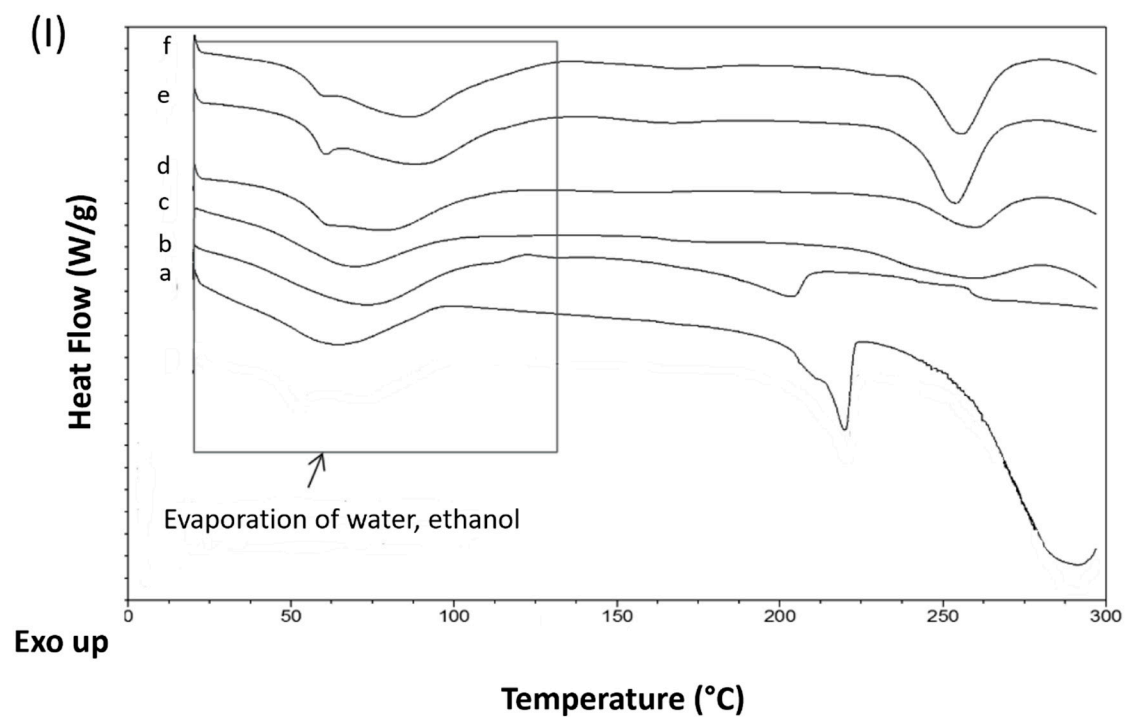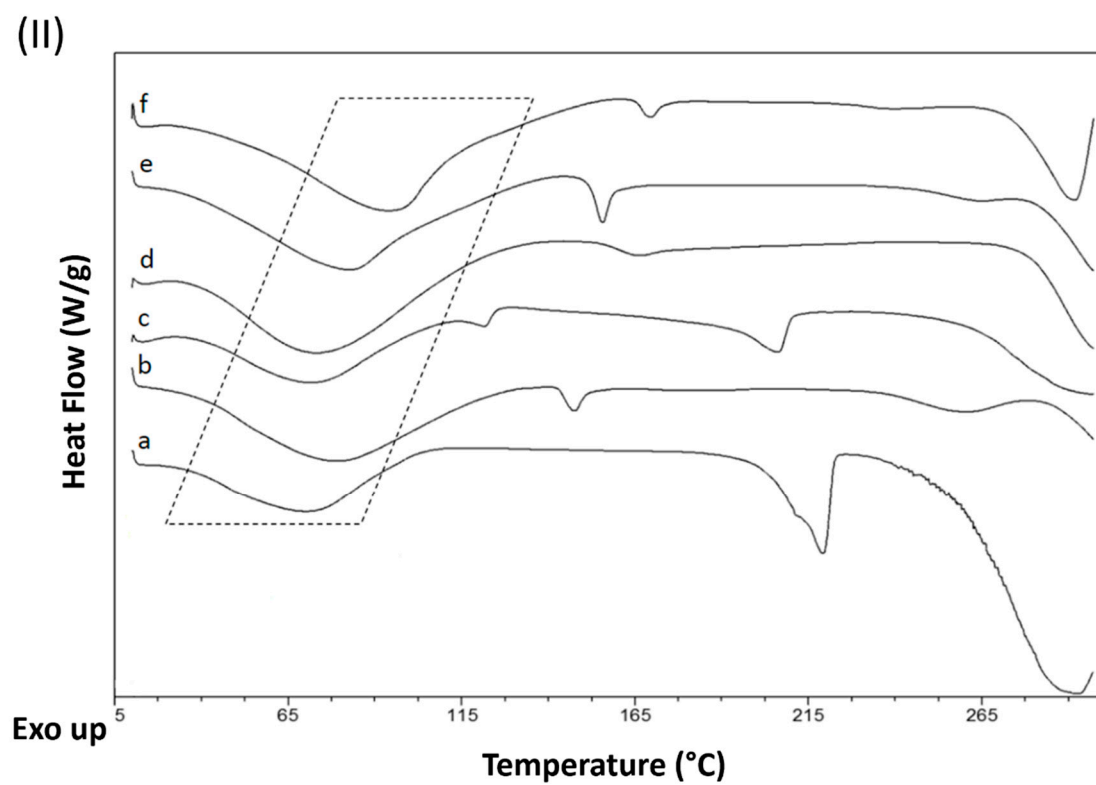

**Figure S5.** DSC thermogram of (I) non-crosslinked and crosslinked (II) hybrids scaffolds. (a) 5%, (b) 10 %, (c) 15 %, (d) 20%, (e) 25%, and (f) 30%. All the peaks describe an endothermic transition.

(I)

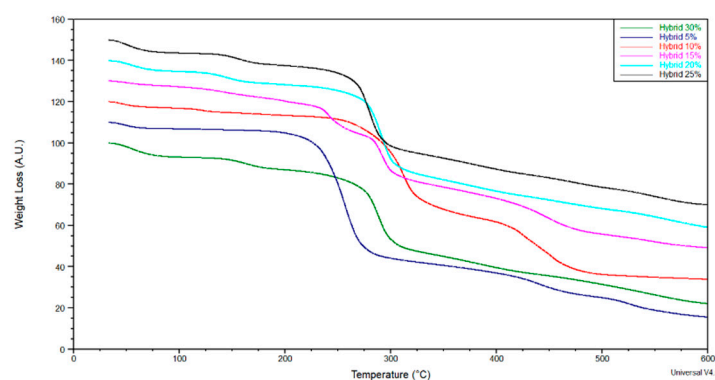

(II)

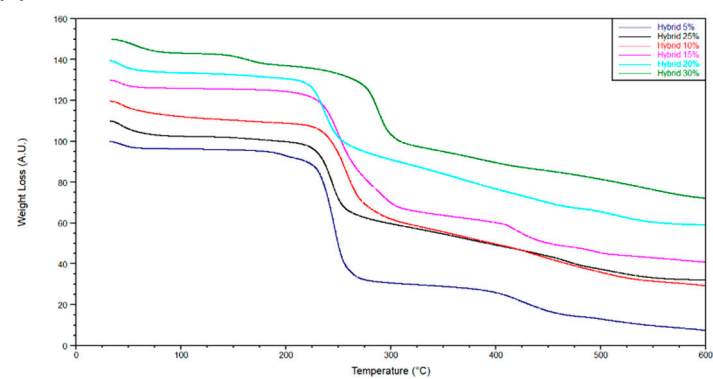

**Figure S6.** TGA thermograms of PVA/Bg hybrid scaffolds. (I) before crosslinking and (II) after crosslinking reaction.

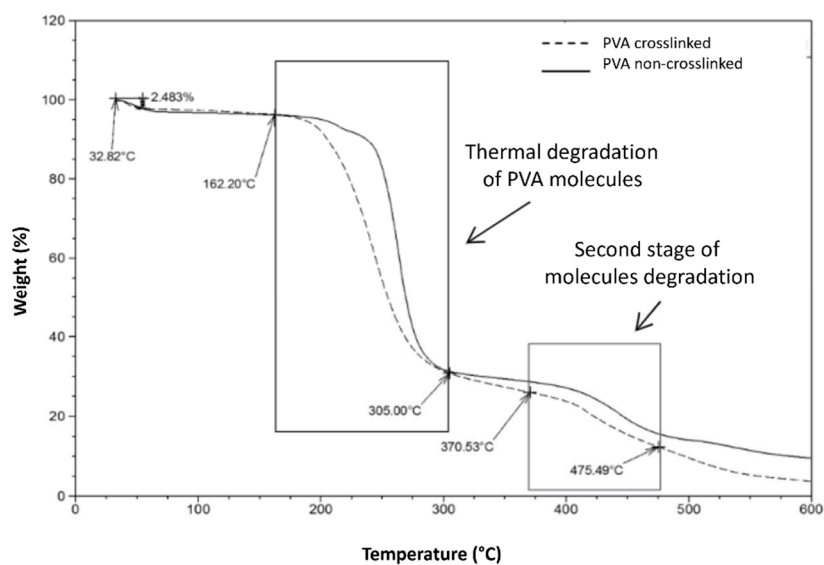

**Figure S7.** PVA thermograms before and after crosslinking.

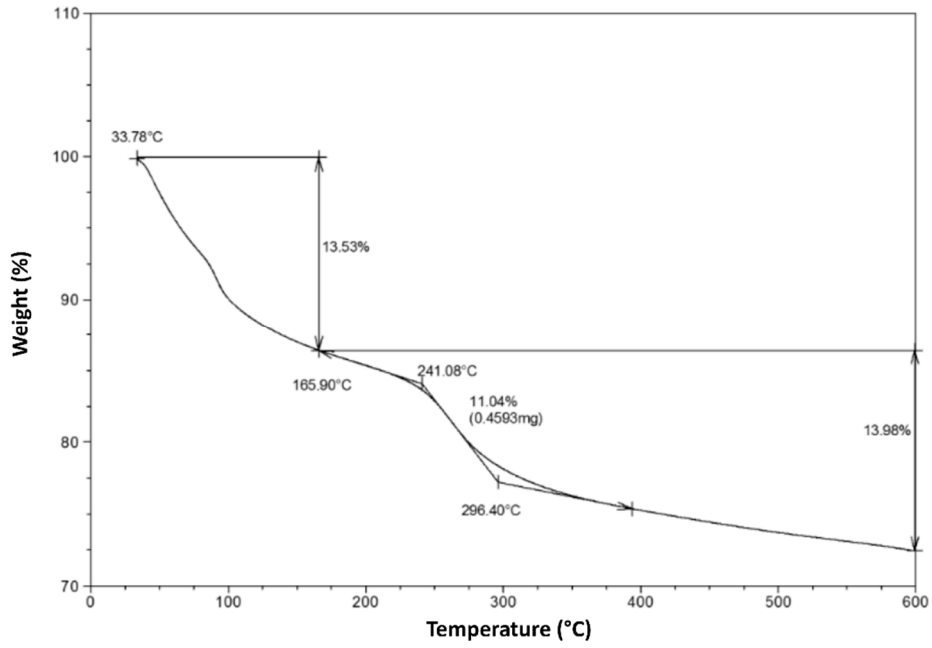

**Figure S8.** Bioglass TGA thermogram.

#### **Determination of standard deviation in fiber diameter measurement in electrospun scaffolds.**

The procedure for calculating the uncertainty associated the fiber diameter ( $\bar{X}$ ) is explained below. Fiber diameters were measured in microns on 30 different fibers under repeatability conditions. For example, the average diameter was  $0.127 \mu\text{m}$  for PVA fibers before chemical crosslinking. The non-statistical uncertainty was determined by considering the uncertainty due to the resolution provided by the ImageJ program:  $u_B(x) = 0.001 \mu\text{m}$ . To determine the statistical uncertainty, it is necessary to know the standard deviation of the sample.

$$s(x) = \sqrt{\frac{\sum_{i=1}^{30} (x_i - \bar{x})^2}{n-1}} = 0.009 \mu\text{m}, \quad (1)$$

The uncertainty type A is obtained: ( $u_A(x)$ )

$$u_A(x) = s(x)/\sqrt{n} = 0.002 \mu\text{m}, \quad (2)$$

Finally, the combined uncertainty,  $u_C(x)$ , was calculated, for which we substitute the values of  $u_A(x)$  and  $u_B(x)$ .

$$u_C(x) = \sqrt{u_A^2(x) + u_B^2(x)} = 0.002 \mu\text{m}, \quad (3)$$

The value of the diameter of the PVA fibers for test a) with the associated uncertainty is therefore:  $(0.127 \pm 0.002) \mu\text{m}$ .
